# Supplementary material
Source: PubMed Central journal article supplement (PMC5104494)
Supplement: NIHMS827797-supplement-supplement_1.pdf [file NIHMS827797-supplement-supplement_1.pdf]

## SUPPORTING INFORMATION

### Design and characterization of chemically-stabilized A $\beta$ 42 oligomers

Ghiam Yamin<sup>1,3,†</sup>, Tien-Phat Vuong Huynh<sup>2,†</sup>, and David B. Teplow<sup>3\*</sup>

<sup>1</sup>Department of Radiology, University of California San Diego School of Medicine, San Diego, CA;

<sup>2</sup>Department of Neurology, School of Medicine, Washington University at St. Louis, St. Louis, MO;

<sup>3</sup>Department of Neurology, David Geffen School of Medicine at UCLA, Los Angeles, CA

<sup>†</sup>These authors contributed equally to the manuscript

\*Send all correspondence to [dteplow@mednet.ucla.edu](mailto:dteplow@mednet.ucla.edu)

Keywords: Amyloid  $\beta$ -protein (A $\beta$ ), PICUP, cross-linking, oligomers

Running Title: Scanning PICUP of A $\beta$

**Table S1.** Occurrence frequencies of WT A $\beta$ 42 oligomers of specific order determined using the Cleveland gel method. Values are percent purity  $\pm$  S.D. Bolded values are those for gel bands that displayed molecular weights matching those expected for oligomers of the nominal oligomer order loaded into the gel.

| Gel band                        | Nominal Oligomer Order       |                              |                              |                              |                              |                              |                              |
|---------------------------------|------------------------------|------------------------------|------------------------------|------------------------------|------------------------------|------------------------------|------------------------------|
|                                 | 1                            | 2                            | 3                            | 4                            | 5                            | 6                            | 7                            |
| <b>Monomer</b>                  | <b>79 <math>\pm</math> 5</b> | 19 $\pm$ 5                   | 13.1 $\pm$ 3.9               | 8.3 $\pm$ 2.8                | 2.4 $\pm$ 1                  | 2.3 $\pm$ 1.3                | 2.9 $\pm$ 0.8                |
| <b>Dimer</b>                    | 2.7 $\pm$ 0.3                | <b>67 <math>\pm</math> 3</b> | 18.5 $\pm$ 0.9               | 15.5 $\pm$ 0.4               | 10.7 $\pm$ 0.3               | 5.1 $\pm$ 0.9                | 5.5 $\pm$ 0.8                |
| <b>Trimer</b>                   | 10.1 $\pm$ 3                 | 2.7 $\pm$ 0.7                | <b>43 <math>\pm</math> 1</b> | 18.6 $\pm$ 2.6               | 19.5 $\pm$ 1.5               | 22.2 $\pm$ 2.5               | 12.8 $\pm$ 2.7               |
| <b>Tetramer</b>                 | 8.3 $\pm$ 2                  | 7.2 $\pm$ 1.3                | 11.2 $\pm$ 3.5               | <b>28 <math>\pm</math> 2</b> | 4.6 $\pm$ 2                  | 4.5 $\pm$ 2.1                | 3.8 $\pm$ 1.6                |
| <b>Pentamer</b>                 | ---                          | 3 $\pm$ 1.4                  | 8 $\pm$ 0.8                  | 17.5 $\pm$ 2.2               | <b>42 <math>\pm</math> 3</b> | 7.2 $\pm$ 0.8                | 10.4 $\pm$ 1.7               |
| <b>Hexamer</b>                  | ---                          | 1.3 $\pm$ 0.6                | 5.6 $\pm$ 0.9                | 8.9 $\pm$ 0.5                | 13.3 $\pm$ 2                 | <b>52 <math>\pm</math> 4</b> | 12 $\pm$ 1.4                 |
| <b>Heptamer</b>                 | ---                          | 1 $\pm$ 0.5                  | ---                          | 3.1 $\pm$ 0.6                | 6 $\pm$ 0.3                  | 4.8 $\pm$ 2.3                | <b>51 <math>\pm</math> 4</b> |
| <b>Octamer</b>                  | ---                          | ---                          | ---                          | 0.4 $\pm$ 0.2                | 1.5 $\pm$ 0.6                | 2 $\pm$ 0.9                  | 2.4 $\pm$ 2                  |
| <b><math>\geq</math>Nonamer</b> | ---                          | ---                          | ---                          | ---                          | 0.3 $\pm$ 0.1                | 0.7 $\pm$ 0.2                | 0.2 $\pm$ 0.2                |

**Table S2.** Occurrence frequencies of [Tyr<sup>1</sup>, Phe<sup>10</sup>]A $\beta$ 42 oligomers of specific order determined using the Cleveland gel method. Values are percent purity  $\pm$  S.D. Bolded values are those for gel bands that displayed molecular weights matching those expected for oligomers of the nominal oligomer order loaded into the gel.

| Gel band                        | Nominal Oligomer Order       |                              |                              |                              |                              |                              |                              |
|---------------------------------|------------------------------|------------------------------|------------------------------|------------------------------|------------------------------|------------------------------|------------------------------|
|                                 | 1                            | 2                            | 3                            | 4                            | 5                            | 6                            | 7                            |
| <b>Monomer</b>                  | <b>93 <math>\pm</math> 1</b> | 16 $\pm$ 2.9                 | 12.7 $\pm$ 3.9               | 5 $\pm$ 3                    | 2.6 $\pm$ 1.3                | 2.8 $\pm$ 0.9                | 4.6 $\pm$ 1.2                |
| <b>Dimer</b>                    | 3.4 $\pm$ 0.4                | <b>74 <math>\pm</math> 3</b> | 29.7 $\pm$ 9                 | 20.6 $\pm$ 9.1               | 11 $\pm$ 3.5                 | 7.2 $\pm$ 2                  | 7 $\pm$ 3.1                  |
| <b>Trimer</b>                   | 2.6 $\pm$ 0.8                | 0.5 $\pm$ 0.4                | <b>36 <math>\pm</math> 8</b> | 19.1 $\pm$ 5.8               | 21 $\pm$ 1.7                 | 18.9 $\pm$ 7.1               | 11.5 $\pm$ 5                 |
| <b>Tetramer</b>                 | 1.5 $\pm$ 0.5                | 5.6 $\pm$ 2.2                | 10.5 $\pm$ 8.2               | <b>28 <math>\pm</math> 5</b> | 6.1 $\pm$ 2.6                | 6.9 $\pm$ 3.4                | 8.7 $\pm$ 5.9                |
| <b>Pentamer</b>                 | ---                          | 2.2 $\pm$ 1.6                | 6.6 $\pm$ 3.8                | 13.7 $\pm$ 2.3               | <b>43 <math>\pm</math> 6</b> | 9.9 $\pm$ 3.2                | 5 $\pm$ 3                    |
| <b>Hexamer</b>                  | ---                          | 1.9 $\pm$ 0.8                | 4 $\pm$ 3                    | 5.4 $\pm$ 1.7                | 12.3 $\pm$ 4.2               | <b>36 <math>\pm</math> 1</b> | 8.2 $\pm$ 3                  |
| <b>Heptamer</b>                 | ---                          | ---                          | 0.2 $\pm$ 0.1                | 6.9 $\pm$ 5                  | 1.8 $\pm$ 1.4                | 16.6 $\pm$ 9.5               | <b>52 <math>\pm</math> 8</b> |
| <b>Octamer</b>                  | ---                          | ---                          | ---                          | 1.2 $\pm$ 0.9                | 0.7 $\pm$ 0.3                | 1.7 $\pm$ 0.8                | 3.9 $\pm$ 1.7                |
| <b><math>\geq</math>Nonamer</b> | ---                          | ---                          | ---                          | ---                          | 1.2 $\pm$ 1                  | 0.4 $\pm$ 0.3                | ---                          |

**Table S3.** Occurrence frequencies of [Phe<sup>10</sup>, Tyr<sup>20</sup>]A $\beta$ 42 oligomers of specific order determined using the Cleveland gel method. Values are percent purity  $\pm$  S.D. Bolded values are those for gel bands that displayed molecular weights matching those expected for oligomers of the nominal oligomer order loaded into the gel.

| Gel band       | Nominal Oligomer Order       |                              |                              |                              |                              |                              |                              |
|----------------|------------------------------|------------------------------|------------------------------|------------------------------|------------------------------|------------------------------|------------------------------|
|                | 1                            | 2                            | 3                            | 4                            | 5                            | 6                            | 7                            |
| Monomer        | <b>74 <math>\pm</math> 3</b> | 17.7 $\pm$ 4.3               | 20.3 $\pm$ 6.7               | 6.1 $\pm$ 0.5                | 1.9 $\pm$ 0.1                | 1.1 $\pm$ 0.2                | 1.1 $\pm$ 0.2                |
| Dimer          | 4.3 $\pm$ 2.9                | <b>64 <math>\pm</math> 5</b> | 27.4 $\pm$ 1.2               | 20.1 $\pm$ 1.4               | 9.4 $\pm$ 0.3                | 4 $\pm$ 0.8                  | 3.1 $\pm$ 2                  |
| Trimer         | 11.4 $\pm$ 3.3               | 5.5 $\pm$ 1.6                | <b>34 <math>\pm</math> 6</b> | 11.4 $\pm$ 1.2               | 9.8 $\pm$ 1                  | 9.7 $\pm$ 3                  | 3.8 $\pm$ 0.6                |
| Tetramer       | 9.7 $\pm$ 2.2                | 8.2 $\pm$ 1.7                | 13.6 $\pm$ 3.2               | <b>41 <math>\pm</math> 2</b> | 5.3 $\pm$ 1.9                | 0.2 $\pm$ 0.2                | 0.7 $\pm$ 0.6                |
| Pentamer       | ---                          | 2.5 $\pm$ 1.6                | 3.7 $\pm$ 1.8                | 13.7 $\pm$ 2.4               | <b>50 <math>\pm</math> 2</b> | 10.5 $\pm$ 1.7               | 9.4 $\pm$ 2.6                |
| Hexamer        | ---                          | 1.9 $\pm$ 1                  | 1.3 $\pm$ 0.6                | 7 $\pm$ 0.9                  | 14.2 $\pm$ 1.3               | <b>63 <math>\pm</math> 2</b> | 10.9 $\pm$ 3                 |
| Heptamer       | ---                          | ---                          | ---                          | 1 $\pm$ 0.6                  | 5.5 $\pm$ 0.9                | 7.3 $\pm$ 3.1                | <b>60 <math>\pm</math> 2</b> |
| Octamer        | ---                          | ---                          | ---                          | ---                          | 2.5 $\pm$ 0.6                | 2.6 $\pm$ 1.7                | 11.6 $\pm$ 1.3               |
| $\geq$ Nonamer | ---                          | ---                          | ---                          | ---                          | 1.5 $\pm$ 0.3                | 1.9 $\pm$ 0.8                | ---                          |

**Table S4.** Occurrence frequencies of [Phe<sup>10</sup>, Tyr<sup>30</sup>]A $\beta$ 42 oligomers of specific order determined using the Cleveland gel method. Values are percent purity  $\pm$  S.D. Bolded values are those for gel bands that displayed molecular weights matching those expected for oligomers of the nominal oligomer order loaded into the gel.

| Gel band       | Nominal Oligomer Order       |                              |                              |                              |                              |                              |                              |
|----------------|------------------------------|------------------------------|------------------------------|------------------------------|------------------------------|------------------------------|------------------------------|
|                | 1                            | 2                            | 3                            | 4                            | 5                            | 6                            | 7                            |
| Monomer        | <b>79 <math>\pm</math> 2</b> | 14 $\pm$ 7.4                 | 8.9 $\pm$ 4.2                | 2.7 $\pm$ 0.9                | 1.5 $\pm$ 0.5                | 1.4 $\pm$ 0.4                | 2.4 $\pm$ 1.2                |
| Dimer          | 6.5 $\pm$ 1                  | <b>75 <math>\pm</math> 7</b> | 24 $\pm$ 3.5                 | 17.4 $\pm$ 2.3               | 6.1 $\pm$ 1.8                | 6 $\pm$ 2.9                  | 4.6 $\pm$ 1.8                |
| Trimer         | 7.4 $\pm$ 1.6                | 5.1 $\pm$ 0.6                | <b>46 <math>\pm</math> 5</b> | 14.6 $\pm$ 0.5               | 9.5 $\pm$ 2.1                | 3.2 $\pm$ 0.8                | 3.5 $\pm$ 0.6                |
| Tetramer       | 6.7 $\pm$ 1.6                | 6.5 $\pm$ 2                  | 16.4 $\pm$ 1.5               | <b>51 <math>\pm</math> 4</b> | 2.6 $\pm$ 1.2                | 2.8 $\pm$ 1.2                | 2.7 $\pm$ 0.7                |
| Pentamer       | ---                          | ---                          | 4.3 $\pm$ 1.6                | 10 $\pm$ 1.4                 | <b>71 <math>\pm</math> 3</b> | 5.9 $\pm$ 0.5                | 3.5 $\pm$ 1.5                |
| Hexamer        | ---                          | ---                          | 0.5 $\pm$ 0.2                | 2.4 $\pm$ 1.1                | 5.8 $\pm$ 3.4                | <b>77 <math>\pm</math> 3</b> | 7.2 $\pm$ 1.3                |
| Heptamer       | ---                          | ---                          | ---                          | ---                          | ---                          | 3.7 $\pm$ 1.7                | <b>76 <math>\pm</math> 2</b> |
| Octamer        | ---                          | ---                          | ---                          | 1.5 $\pm$ 0.7                | ---                          | ---                          | ---                          |
| $\geq$ Nonamer | ---                          | ---                          | ---                          | ---                          | 3.4 $\pm$ 0.9                | 0.7 $\pm$ 0.6                | 0.5 $\pm$ 0.4                |

**Table S5.** Occurrence frequencies of [Phe<sup>10</sup>, Tyr<sup>42</sup>]A $\beta$ 42 oligomers of specific order determined using the Cleveland gel method. Values are percent purity  $\pm$  S.D. Bolded values are those for gel bands that displayed molecular weights matching those expected for oligomers of the nominal oligomer order loaded into the gel.

| Gel band       | Nominal Oligomer Order         |                                |                                |                                |                                |                                |                                |
|----------------|--------------------------------|--------------------------------|--------------------------------|--------------------------------|--------------------------------|--------------------------------|--------------------------------|
|                | 1                              | 2                              | 3                              | 4                              | 5                              | 6                              | 7                              |
| Monomer        | <b>72 <math>\pm</math> 1.5</b> | 7.3 $\pm$ 2.3                  | 2.1 $\pm$ 0                    | 1 $\pm$ 0.2                    | 0.7 $\pm$ 0.3                  | 0.8 $\pm$ 0.4                  | 0.2 $\pm$ 0.1                  |
| Dimer          | 9 $\pm$ 1.2                    | <b>82 <math>\pm</math> 0.9</b> | 7.9 $\pm$ 1.4                  | 5.1 $\pm$ 1.2                  | 1.7 $\pm$ 0.5                  | 0.9 $\pm$ 0.2                  | 0.8 $\pm$ 0.4                  |
| Trimer         | 14 $\pm$ 3.6                   | 2.3 $\pm$ 1                    | <b>81 <math>\pm</math> 2.3</b> | 10.9 $\pm$ 0.4                 | 2.7 $\pm$ 0.6                  | 2.6 $\pm$ 1.1                  | 2.5 $\pm$ 0.7                  |
| Tetramer       | 5 $\pm$ 2.2                    | 8.5 $\pm$ 2.5                  | ---                            | <b>75 <math>\pm</math> 2.6</b> | 1.8 $\pm$ 1.4                  | 2.4 $\pm$ 1                    | 2.4 $\pm$ 1.3                  |
| Pentamer       | ---                            | ---                            | 0.7 $\pm$ 0.6                  | ---                            | <b>90 <math>\pm</math> 0.6</b> | ---                            | 0.9 $\pm$ 0.7                  |
| Hexamer        | ---                            | ---                            | 7.6 $\pm$ 1.7                  | 1 $\pm$ 0.8                    | ---                            | <b>92 <math>\pm</math> 1.7</b> | ----                           |
| Heptamer       | ---                            | ---                            | ---                            | ---                            | ---                            | ---                            | <b>92 <math>\pm</math> 1.2</b> |
| Octamer        | ---                            | ---                            | ---                            | 7.1 $\pm$ 1.4                  | ---                            | ---                            | ---                            |
| $\geq$ Nonamer | ---                            | ---                            | 0.6 $\pm$ 0.5                  | ---                            | 3.2 $\pm$ 0.2                  | 1.8 $\pm$ 1.4                  | 1.5 $\pm$ 1.2                  |

**Table S6.** Occurrence frequencies of WT A $\beta$ 42 oligomers of specific order determined using two consecutive Cleveland gels. Values are percent purity  $\pm$  S.D. Bolded values are those for gel bands that displayed molecular weights matching those expected for oligomers of the nominal oligomer order loaded into the gel.

| Gel band                        | Nominal Oligomer Order       |                              |                              |                              |                              |                              |                              |                              |
|---------------------------------|------------------------------|------------------------------|------------------------------|------------------------------|------------------------------|------------------------------|------------------------------|------------------------------|
|                                 | 1                            | 2                            | 3                            | 4                            | 5                            | 6                            | 7                            | 8                            |
| <b>Monomer</b>                  | <b>96 <math>\pm</math> 2</b> | 1.1 $\pm$ 0.6                | 0.4 $\pm$ 0.3                | 0.7 $\pm$ 0.5                | 0.5 $\pm$ 0.4                | ---                          | ---                          | ---                          |
| <b>Dimer</b>                    | 0.2 $\pm$ 0.2                | <b>90 <math>\pm</math> 2</b> | 2.9 $\pm$ 0.7                | 11.7 $\pm$ 1.4               | 5.2 $\pm$ 0.4                | 0.6 $\pm$ 0.3                | 0.4 $\pm$ 0.3                | ---                          |
| <b>Trimer</b>                   | 2.6 $\pm$ 1.4                | 0.4 $\pm$ 0.3                | <b>90 <math>\pm</math> 2</b> | 6.1 $\pm$ 1.3                | 8.3 $\pm$ 0.6                | 10.2 $\pm$ 1.2               | 5.1 $\pm$ 0.6                | 2.9 $\pm$ 1.8                |
| <b>Tetramer</b>                 | 1.2 $\pm$ 0.7                | 4.0 $\pm$ 1.4                | 2.2 $\pm$ 0.3                | <b>61 <math>\pm</math> 5</b> | 3.3 $\pm$ 1.5                | 2.7 $\pm$ 0.5                | 5.2 $\pm$ 2.6                | 0.8 $\pm$ 0.5                |
| <b>Pentamer</b>                 | ---                          | ---                          | 0.9 $\pm$ 0.7                | 8.6 $\pm$ 3.7                | <b>59 <math>\pm</math> 5</b> | 2.6 $\pm$ 0.4                | 1.3 $\pm$ 0.6                | 1.0 $\pm$ 0.9                |
| <b>Hexamer</b>                  | ---                          | 5.0 $\pm$ 2.6                | 2.9 $\pm$ 0.6                | 8.8 $\pm$ 2.8                | 10.7 $\pm$ 1.6               | <b>57 <math>\pm</math> 4</b> | 5.1 $\pm$ 1.5                | 5.7 $\pm$ 3.9                |
| <b>Heptamer</b>                 | ---                          | ---                          | 0.4 $\pm$ 0.3                | 0.6 $\pm$ 0.5                | 2.4 $\pm$ 1.3                | 15.7 $\pm$ 3.0               | <b>64 <math>\pm</math> 5</b> | 2.0 $\pm$ 0.9                |
| <b>Octamer</b>                  | ---                          | ---                          | ---                          | 1.9 $\pm$ 1.3                | 2.4 $\pm$ 0.1                | 5.1 $\pm$ 0.8                | 9.1 $\pm$ 1.7                | <b>83 <math>\pm</math> 2</b> |
| <b><math>\geq</math>Nonamer</b> | ---                          | ---                          | ---                          | 0.6 $\pm$ 0.4                | 3.2 $\pm$ 0.4                | 5.9 $\pm$ 0.6                | 9.8 $\pm$ 6.8                | ---                          |

**Table S7.** Occurrence frequencies of [Phe<sup>10</sup>, Tyr<sup>42</sup>]A $\beta$ 42 oligomers of specific order determined using two consecutive Cleveland gels. Values are percent purity  $\pm$  S.D. Bolded values are those for gel bands that displayed molecular weights matching those expected for oligomers of the nominal oligomer order loaded into the gel.

| Gel band       | Nominal Oligomer Order         |                                |                                |                              |                                |                                |                              |
|----------------|--------------------------------|--------------------------------|--------------------------------|------------------------------|--------------------------------|--------------------------------|------------------------------|
|                | 1                              | 2                              | 3                              | 4                            | 5                              | 6                              | 7                            |
| Monomer        | <b>96 <math>\pm</math> 0.7</b> | 2.0 $\pm$ 1.1                  | 1.7 $\pm$ 0.9                  | 0.6 $\pm$ 0.3                | ---                            | ---                            | ---                          |
| Dimer          | 2.3 $\pm$ 1.2                  | <b>96 <math>\pm</math> 1.4</b> | 8.5 $\pm$ 2.0                  | 4.0 $\pm$ 0.7                | 0.7 $\pm$ 0.3                  | 0.2 $\pm$ 0.2                  | 0.4 $\pm$ 0.3                |
| Trimer         | 1.0 $\pm$ 0.4                  | 0.5 $\pm$ 0.4                  | <b>87 <math>\pm</math> 0.4</b> | 6.7 $\pm$ 0.5                | 3.0 $\pm$ 0.6                  | 0.9 $\pm$ 0.4                  | 0.8 $\pm$ 0.6                |
| Tetramer       | 0.5 $\pm$ 0.2                  | 1.8 $\pm$ 0.4                  | ---                            | <b>83 <math>\pm</math> 3</b> | 3.9 $\pm$ 2.1                  | 2.4 $\pm$ 0.2                  | 1.1 $\pm$ 0.9                |
| Pentamer       | ---                            | ---                            | 1.3 $\pm$ 0.5                  | 2.0 $\pm$ 1.6                | <b>91 <math>\pm</math> 2.3</b> | 2.7 $\pm$ 1.2                  | 1.2 $\pm$ 1.0                |
| Hexamer        | ---                            | ---                            | 1.1 $\pm$ 0.9                  | 1.9 $\pm$ 0.9                | ---                            | <b>92 <math>\pm</math> 1.3</b> | 3.5 $\pm$ 1.5                |
| Heptamer       | ---                            | ---                            | ---                            | ---                          | ---                            | ---                            | <b>92 <math>\pm</math> 3</b> |
| Octamer        | ---                            | ---                            | ---                            | 2.2 $\pm$ 0.4                | 0.1 $\pm$ 0.1                  | ---                            | ---                          |
| $\geq$ Nonamer | ---                            | ---                            | ---                            | ---                          | 1.7 $\pm$ 1.1                  | 1.8 $\pm$ 1.1                  | 1.5 $\pm$ 1.2                |



## SUPPORTING FIGURE LEGENDS

**Fig. S1. [Tyr<sup>1</sup>, Phe<sup>10</sup>]A $\beta$ 42 oligomer stability.** [Tyr<sup>1</sup>, Phe<sup>10</sup>]A $\beta$ 42 was cross-linked and then electrophoresed in an SDS gel (see Methods). (a) Coomassie-stained oligomer bands were excised, re-electrophoresed, and the resulting bands visualized by silver staining. Each lane number represents the expected oligomer order. (b) Image J and MagicPlot software were used to determine the occurrence frequencies (%) of oligomers of each order. Data are representative of at least three independent experiments.

**Fig. S2. [Phe<sup>10</sup>, Tyr<sup>20</sup>]A $\beta$ 42 oligomer stability.** [Phe<sup>10</sup>, Tyr<sup>20</sup>]A $\beta$ 42 was cross-linked and then electrophoresed in an SDS gel (see Methods). (a) Coomassie-stained oligomer bands were excised, re-electrophoresed, and the resulting bands visualized by silver staining. Each lane number represents the expected oligomer order. (b) Image J and MagicPlot software were used to determine the occurrence frequencies (%) of oligomers of each order. Data are representative of at least three independent experiments.

**Fig. S3. [Phe<sup>10</sup>, Tyr<sup>30</sup>]A $\beta$ 42 oligomer stability.** [Phe<sup>10</sup>, Tyr<sup>30</sup>]A $\beta$ 42 was cross-linked and then electrophoresed in an SDS gel (see Methods). (a) Coomassie-stained oligomer bands were excised, re-electrophoresed, and the resulting bands visualized by silver staining. Each lane number represents the expected oligomer order. (b) Image J and MagicPlot software were used to determine the occurrence frequencies (%) of oligomers of each order. Data are representative of at least three independent experiments.

**Fig. S4. WT A $\beta$ 42 oligomer stability after two consecutive Cleveland gel procedures.** WT A $\beta$ 42 was cross-linked and then electrophoresed in two consecutive SDS gels (see Methods). (a) Coomassie-stained oligomer bands were excised, re-electrophoresed, and the resulting bands visualized by silver staining. Each lane number represents the expected oligomer order. (b) Image J and MagicPlot software were used to determine the occurrence frequencies (%) of oligomers of each order. Data are representative of at least three independent experiments.

**Fig. S5. [Phe<sup>10</sup>, Tyr<sup>42</sup>]A $\beta$ 42 oligomer stability after two consecutive Cleveland gel procedures.** [Phe<sup>10</sup>, Tyr<sup>42</sup>]A $\beta$ 42 was cross-linked and then electrophoresed in two consecutive SDS gels (see Methods). (a) Coomassie-stained oligomer bands were excised, re-electrophoresed, and the resulting bands visualized by silver staining. Each lane number represents the expected oligomer order. (b) Image J and MagicPlot software were used to determine the occurrence frequencies (%) of oligomers of each order. Data are representative of at least three independent experiments.

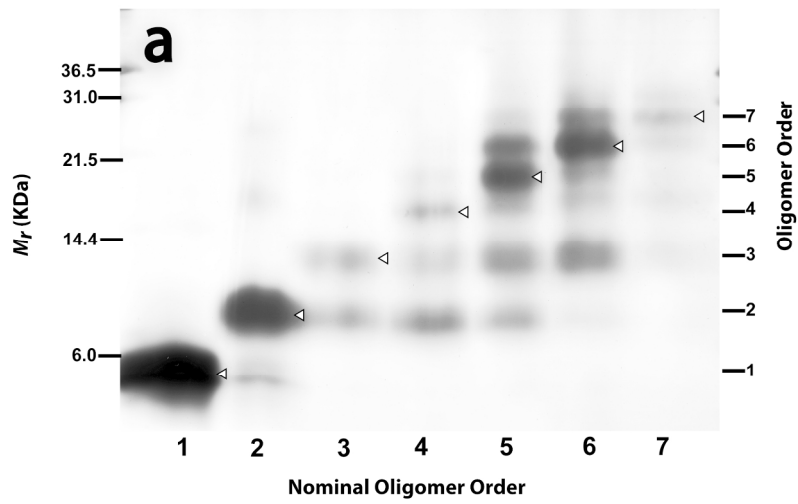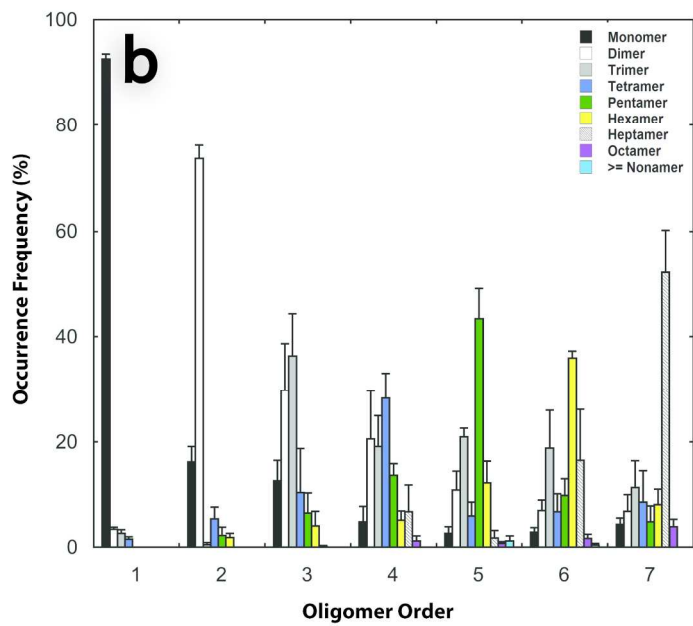

Fig. S1

153x234mm (300 x 300 DPI)

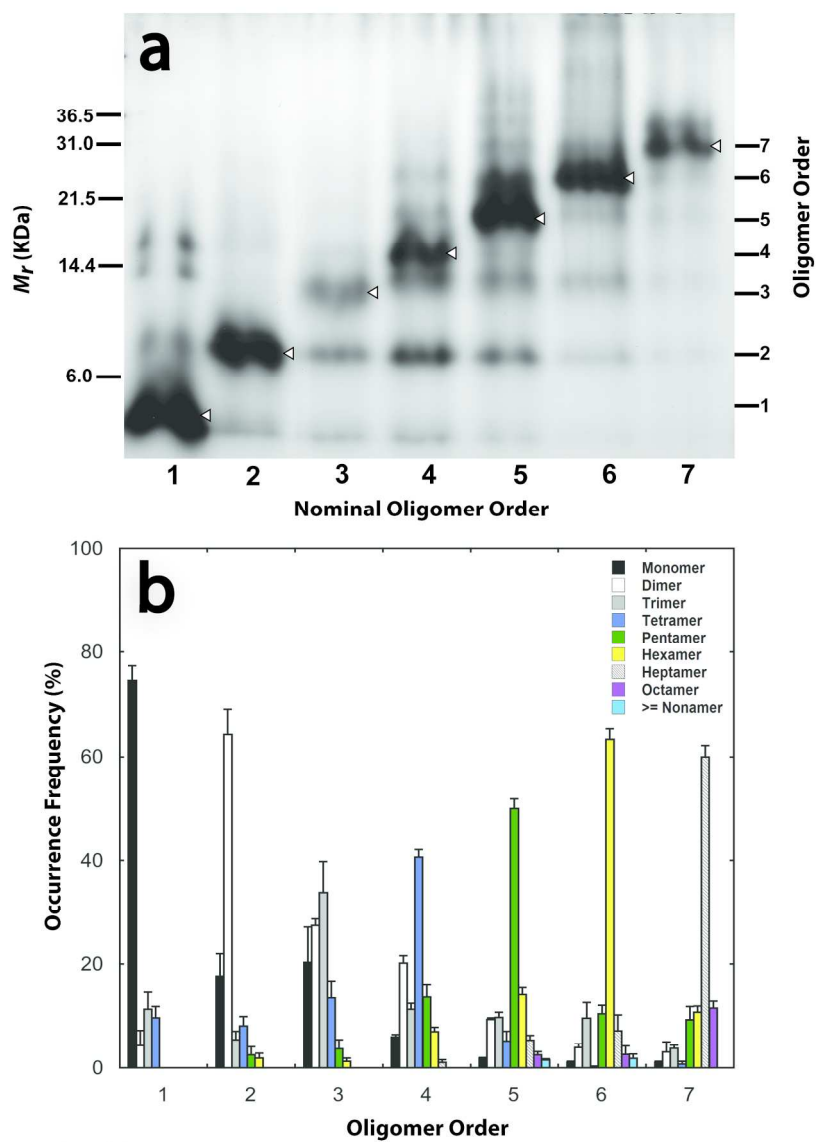

Fig. S2

146x218mm (300 x 300 DPI)

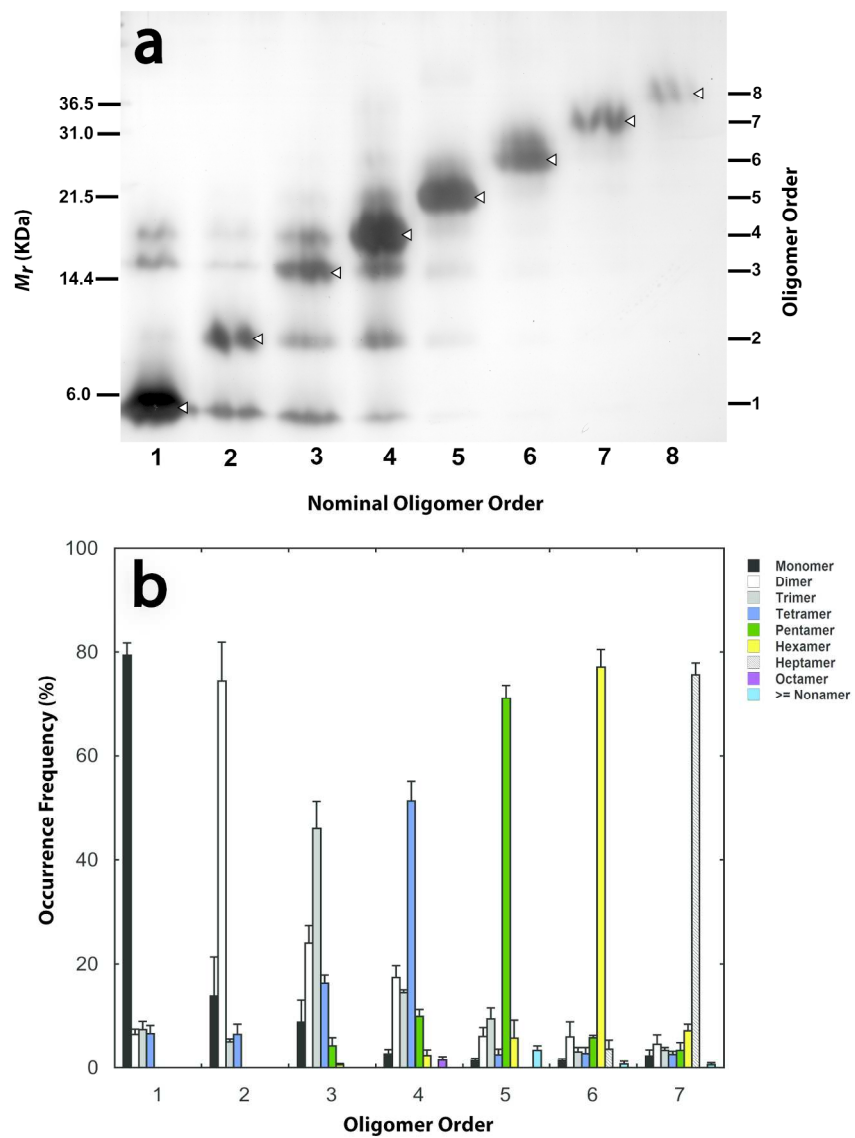

Fig. S3

166x236mm (300 x 300 DPI)

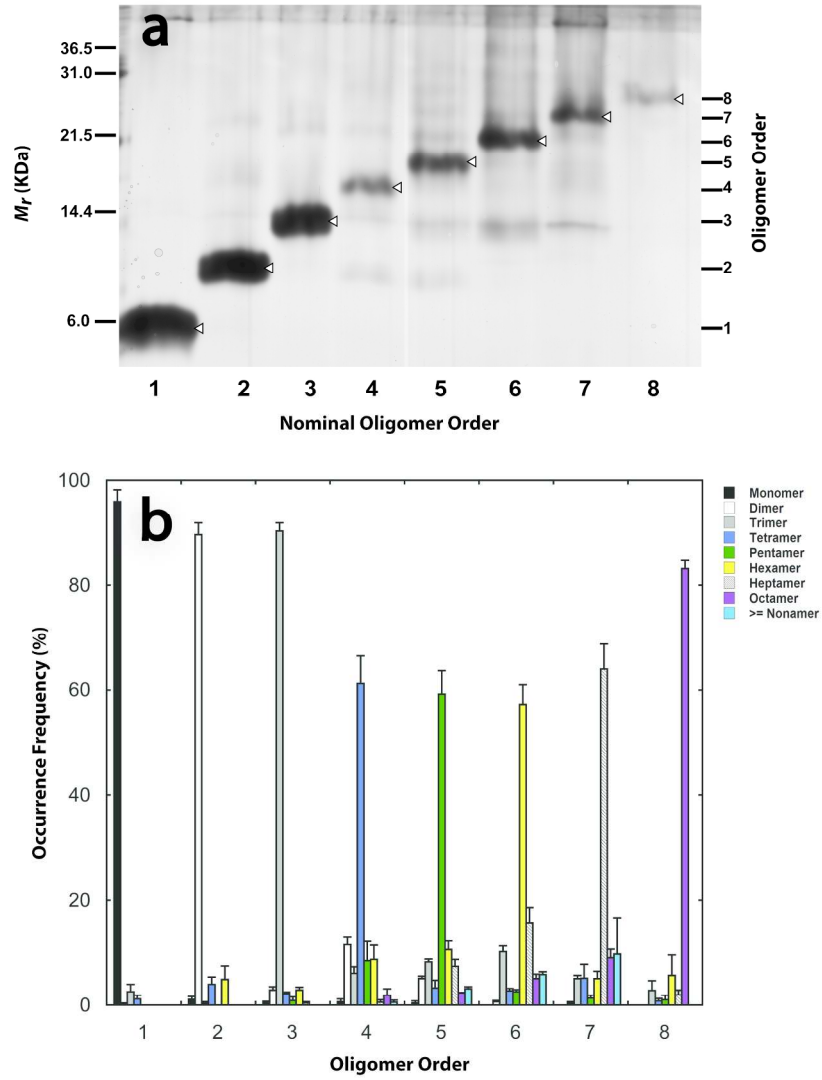

Fig. S4

171x253mm (300 x 300 DPI)

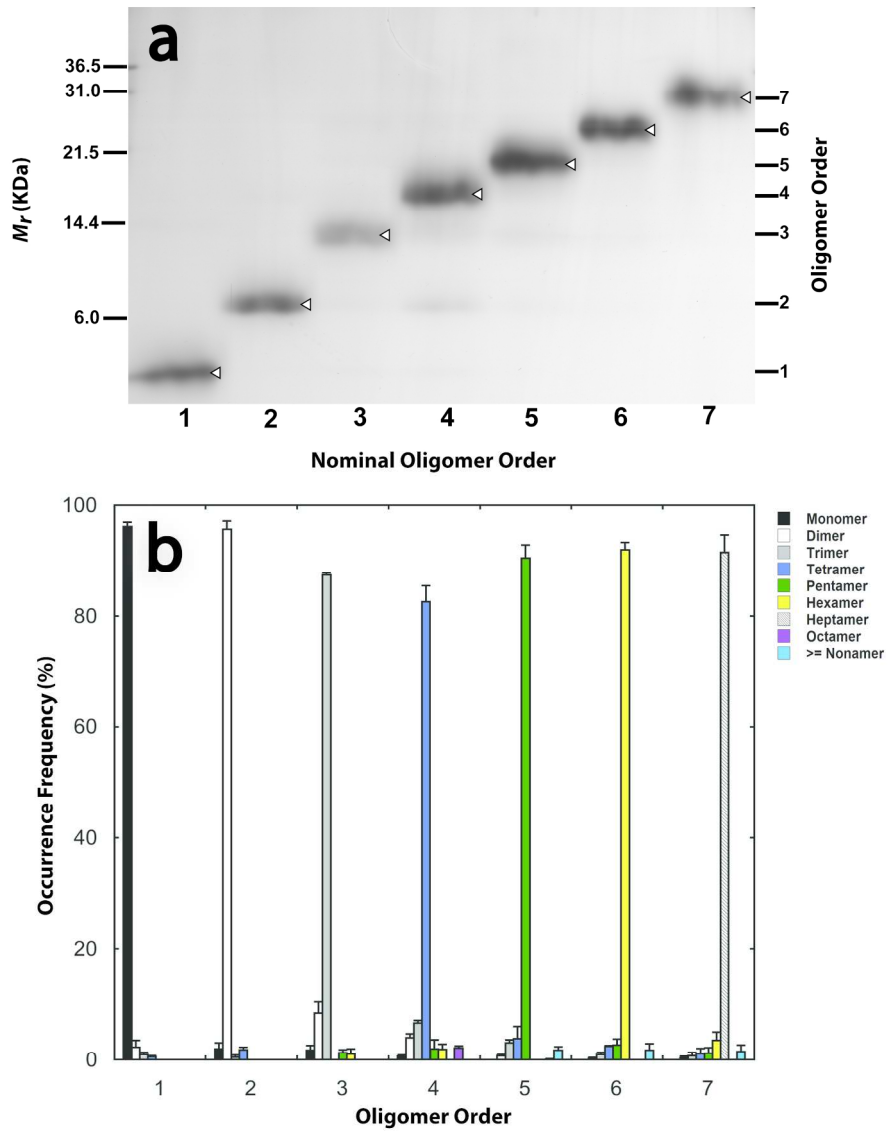

Fig. S5

167x227mm (300 x 300 DPI)
